# Supplementary material
Source: PubMed Central journal article supplement (PMC2710622)
Supplement: 0904512106_0904512106SI.pdf [file 0904512106_0904512106SI.pdf]

# Supporting Information

Angert et al. 10.1073/pnas.0904512106

**Table S1. Parameter estimates for calculating the magnitude of the storage effect**

| Parameter                                                         | Value |
|-------------------------------------------------------------------|-------|
| Species x time variance component for germination                 | 1.46  |
| Species x time variance component for per germinant fecundity     | 1.27  |
| Species x time covariance component for germination and fecundity | 0.49  |
| Average survival of ungerminated seeds, $\bar{s}$                 | 0.41  |
| Average germination fraction                                      | 0.45  |
| Average rate of loss from the seed bank, $\bar{\beta}$            | 0.77  |
| Number of species                                                 | 10    |

These are the parameters for Eqs. 30, 32, and 34 (*SI Appendix*) and are calculated from demographic data on winter annual plants at the University of Arizona Desert Laboratory (see *Materials and Methods*).

**Table S2. Partitioning of the low-density log growth rate from the storage effect**

| Mechanism                                   | Boost to $\bar{r}/\beta$ | Boost to $\bar{r}$ |
|---------------------------------------------|--------------------------|--------------------|
| Germination Variation                       | 0.067                    | 0.052              |
| Reproduction Variation                      | 0.032                    | 0.025              |
| Covariation of Germination and Reproduction | 0.035                    | 0.027              |
| Total                                       | 0.133                    | 0.103              |

Storage effect is partitioned into parts due to germination variation, reproductive variation, and the covariation of germination and reproduction calculated with Eqs. 30, 32, and 34 in [SI Appendix](#).

**Table S3. Demographic difference matrices**

|             | <i>ERCI</i> | <i>ERLA</i> | <i>ERTE</i> | <i>EVMU</i> | <i>PERE</i> | <i>PLIN</i> | <i>PLPA</i> | <i>SCBA</i> | <i>STMI</i> |
|-------------|-------------|-------------|-------------|-------------|-------------|-------------|-------------|-------------|-------------|
| <i>ERCI</i> |             | 1.57        | 0.86        | 2.47        | 1.02        | 1.02        | 1.39        | 1.11        | 1.04        |
| <i>ERLA</i> | 0.52        |             | 2.51        | 2.91        | 2.62        | 1.29        | 1.20        | 1.67        | 1.38        |
| <i>ERTE</i> | 0.05        | 0.89        |             | 3.90        | 1.96        | 0.85        | 1.54        | 2.17        | 2.72        |
| <i>EVMU</i> | 0.29        | 0.03        | 0.59        |             | 4.72        | 2.50        | 1.76        | 2.29        | 1.39        |
| <i>PERE</i> | 0.09        | 1.02        | 0.00        | 0.69        |             | 2.64        | 2.18        | 3.07        | 2.39        |
| <i>PLIN</i> | 0.03        | 0.77        | 0.00        | 0.49        | 0.02        |             | 1.12        | 1.46        | 1.48        |
| <i>PLPA</i> | 0.01        | 0.63        | 0.02        | 0.38        | 0.05        | 0.01        |             | 1.85        | 1.56        |
| <i>SCBA</i> | 0.32        | 0.02        | 0.63        | 0.00        | 0.74        | 0.53        | 0.41        |             | 1.23        |
| <i>STMI</i> | 0.19        | 0.08        | 0.45        | 0.01        | 0.54        | 0.36        | 0.26        | 0.02        |             |

Species-by-year squared difference matrix given in upper diagonal. Species-by-precipitation squared difference matrix given in lower diagonal. Species abbreviations are the first two letters of the genus and specific epithet given in *Materials and Methods*.

**Table S4. Functional trait difference matrices**

|             | <i>ERCI</i> | <i>ERLA</i> | <i>ERTE</i> | <i>EVMU</i> | <i>PERE</i> | <i>PLIN</i> | <i>PLPA</i> | <i>SCBA</i> | <i>STMI</i> |
|-------------|-------------|-------------|-------------|-------------|-------------|-------------|-------------|-------------|-------------|
| <i>ERCI</i> |             | 3.95        | 0.21        | 9.60        | 0.30        | 2.57        | 0.68        | 7.30        | 12.55       |
| <i>ERLA</i> | 4.12        |             | 5.99        | 1.23        | 2.08        | 0.15        | 1.35        | 0.51        | 2.42        |
| <i>ERTE</i> | 0.10        | 5.53        |             | 12.66       | 1.01        | 4.25        | 1.65        | 10.00       | 16.02       |
| <i>EVMU</i> | 16.51       | 4.14        | 19.24       |             | 6.51        | 2.24        | 5.17        | 0.16        | 0.20        |
| <i>PERE</i> | 1.90        | 11.61       | 1.11        | 29.61       |             | 1.12        | 0.08        | 4.65        | 8.98        |
| <i>PLIN</i> | 0.00        | 4.12        | 0.10        | 16.51       | 1.90        |             | 0.61        | 1.21        | 3.76        |
| <i>PLPA</i> | 0.11        | 2.90        | 0.42        | 13.96       | 2.91        | 0.11        |             | 3.53        | 7.39        |
| <i>SCBA</i> | 2.58        | 0.18        | 3.71        | 6.05        | 8.90        | 2.57        | 1.63        |             | 0.71        |
| <i>STMI</i> | 4.29        | 0.00        | 5.73        | 3.97        | 11.90       | 4.29        | 3.04        | 0.22        |             |

Squared differences in principal component I score for analysis of variation in RGR and  $\Delta$  are given in upper diagonal. Squared differences in principal component I score for analysis of variation in 5 key traits (Nleaf, LMR, Jmax:VCmax, SLA and RGR plasticity) are given in lower diagonal. Species abbreviations are the first two letters of the genus and specific epithet given in *Materials and Methods*.

**Table S5. Comparison of results with and without phylogenetic distance correction**

| Functional trait difference matrix | Demographic difference matrix | Mantel <i>P</i> value | Partial Mantel <i>P</i> value |
|------------------------------------|-------------------------------|-----------------------|-------------------------------|
| 5 key traits                       | Species × year interaction    | 0.0003                | <0.001                        |
| RGR-Δ                              | Species × year interaction    | 0.0410                | 0.048                         |
| 5 key traits                       | Species × precip interaction  | 0.0068                | 0.009                         |
| RGR-Δ                              | Species × precip interaction  | 0.0453                | 0.042                         |

Results are shown for partial Mantel tests calculated in the R package *vegan* with a phylogenetic distance matrix based on equal branch lengths. Results using a phylogenetic distance matrix based on pseudo branch length differences were qualitatively identical.

## Other Supporting Information Files

[SI Appendix](#)
